# Supplementary material
Source: publisher site journal article supplement (https://www.dovepress.com/article/342097)
Supplement: Supplementary file 1 [file get_supplementary_file.php]

### Supplementary material

Statistical analysis results regarding the correlation between serum GFAP levels and the degree of neurological deficit based on the NIHSS score in ischemic stroke patients in this study

| Nama | Umur | L/P | Merokok | DM | Dislipidemia | HT | Σ FR | NIHSS | GFAP (ng/mL) |
|------|------|-----|---------|----|--------------|----|------|-------|--------------|
| 01   | 81   | L   | v       |    | v            | v  | 3    | 8     | 0.3          |
| 02   | 65   | L   | v       |    |              | v  | 2    | 8     | 0.5          |
| 03   | 59   | L   | v       |    |              | v  | 2    | 5     | 0.5          |
| 04   | 51   | P   |         |    |              | v  | 1    | 4     | 0.3          |
| 05   | 57   | L   | v       |    | v            | v  | 3    | 4     | 0.7          |
| 06   | 41   | P   |         |    | v            | v  | 2    | 8     | 1            |
| 07   | 31   | L   | v       |    |              |    | 1    | 8     | 0.3          |
| 08   | 37   | L   | v       | v  |              | v  | 3    | 4     | 0.2          |
| 09   | 54   | P   |         |    | v            | v  | 2    | 5     | 0.5          |
| 10   | 59   | L   |         | v  |              | v  | 2    | 8     | 0.4          |
| 11   | 65   | L   | v       |    | v            | v  | 3    | 9     | 0.3          |
| 12   | 52   | L   | v       |    | v            | v  | 3    | 8     | 0.4          |
| 13   | 68   | P   |         |    | v            | v  | 2    | 8     | 0.7          |
| 14   | 65   | P   |         |    | v            | v  | 2    | 9     | 0.4          |
| 15   | 66   | L   | v       |    |              |    | 1    | 7     | 0.7          |
| 16   | 62   | P   |         |    | v            | v  | 2    | 6     | 0.7          |
| 17   | 71   | P   |         |    |              | v  | 1    | 6     | 0.3          |
| 18   | 45   | L   |         |    |              | v  | 1    | 15    | 0.7          |
| 19   | 91   | P   |         |    |              | v  | 1    | 15    | 0.5          |
| 20   | 60   | L   |         |    |              | v  | 1    | 17    | 0.8          |
| 21   | 64   | L   | v       | v  | v            | v  | 4    | 16    | 1.0          |
| 22   | 64   | L   |         | v  |              | v  | 2    | 15    | 0.7          |
| 23   | 57   | P   |         |    | v            | v  | 2    | 14    | 0.5          |
| 24   | 53   | L   | v       | v  |              | v  | 3    | 20    | 0.5          |
| 25   | 71   | L   | v       |    | v            | v  | 2    | 18    | 0.7          |
| 26   | 73   | L   | v       |    | v            |    | 2    | 19    | 0.5          |
| 27   | 62   | L   | v       |    |              | v  | 2    | 20    | 0.6          |
| 28   | 72   | P   |         | v  | v            | v  | 3    | 21    | 1.9          |
| 29   | 66   | L   |         |    |              | v  | 1    | 16    | 1.8          |
| 30   | 75   | P   |         |    | v            | v  | 2    | 18    | 0.7          |
| 31   | 63   | L   | v       |    | v            | v  | 2    | 21    | 1.0          |
| 32   | 65   | P   | v       | v  |              | v  | 3    | 15    | 0.8          |
| 33   | 59   | P   |         | v  |              | v  | 2    | 16    | 1            |

Keterangan: FR: Faktor Risiko; DM: Diabetes Melitus; HT: Hipertensi; LAO: *Large Artery Occlusion*, NIHSS: *National Institutes of Health Stroke Scale*; SAO: *Small Artery Occlusion*
